# Supplementary material
Source: PubMed Central journal article supplement (PMC4792736)
Supplement: NIHMS748889-supplement-Supplementary.pdf [file NIHMS748889-supplement-Supplementary.pdf]

# Supplementary Figure 1

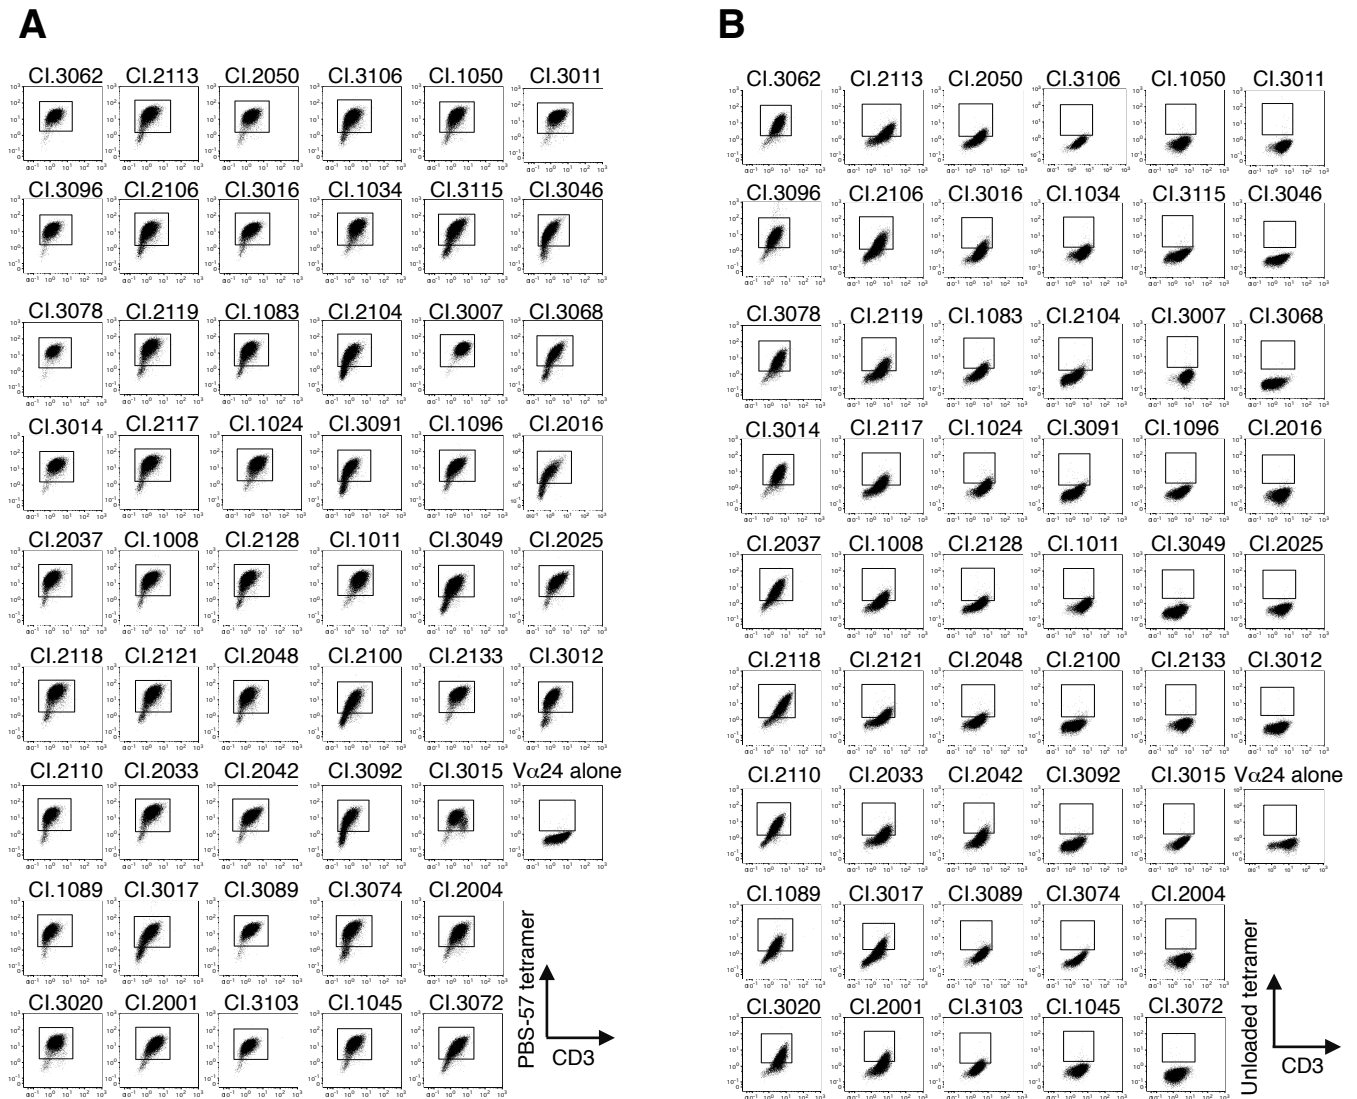

**Supplementary Figure 1. All cloned V $\beta$ 11 TCR $\beta$  chains are similarly stained with the PBS-57 tetramer, whereas the chains exhibit various intensities of self-ligand tetramer staining. (A) All SupT1 transfectants were stained with the PBS-57 tetramer (5  $\mu$ g/ml) and exhibited over 90% staining positivity. (B) All SupT1 transfectants were stained with unloaded tetramer (5  $\mu$ g/ml) and are shown according to the % staining values in descending order. Data for CI.1140, CI.3010, and CI.3041 are shown in Fig. 3A.**

## Supplementary Table 1

### Previously reported iNKT TCR $\beta$ chains highly reactive for self-ligands possess 2 of the 3 motifs.

Rossjohn J et al. Nat Rev Immunol., 2012<sup>a</sup>

| VD sequence    | J sequence | $\geq 2$ D/E | J2-5 | 13 aa | Ligands          |
|----------------|------------|--------------|------|-------|------------------|
| CASSEEGALKESVG | TQYF       | Yes          | Yes  | No    | LPC              |
| CASSEFGGTERT   | QETQYF     | Yes          | Yes  | No    | $\beta$ -GalCer  |
| CASSGLRDRGL    | YEQYF      | No           | No   | No    | $\alpha$ -GalCer |

Matulis G et al. PLoS Biol., 2010<sup>b</sup>

| VD sequence  | J sequence | $\geq 2$ D/E | J2-5 | 13 aa | Avidity for $\beta$ -GlcCer |
|--------------|------------|--------------|------|-------|-----------------------------|
| CASSEFGGTERT | QETQYF     | Yes          | Yes  | No    | High                        |
| CASTGASGT    | YEQYF      | No           | No   | No    | ↓                           |
| CASSEPS      | SGNTIYF    | No           | No   | No    |                             |
| CASSDQN      | TEAFF      | No           | No   | No    |                             |
| CASSAMD      | TEAFF      | No           | No   | No    |                             |
| CASARGVN     | EQYF       | No           | No   | No    |                             |
| CASSGDRRQGAH | QPQHF      | No           | No   | No    | Low                         |

LPC,  $\beta$ -galactosylceramide ( $\beta$ -GalCer), and  $\beta$ -GlcCer are endogenous antigens. <sup>a</sup>reference (2), <sup>b</sup>reference (40).
